# Supplementary material for: Double-malate bridging tri-lanthanoid cluster encapsulated arsenotungstates: syntheses, structures, luminescence and magnetic properties
Source: Royal Society of Chemistry journal article supplement (doi:10.1039/c5dt01323b), 2015-01-01
Supplement: c5dt01323b1.pdf [file c5dt01323b1.pdf]

## Double-malate bridging tri-lanthanoid cluster encapsulated arsenotungstates: syntheses, structures, luminescence and magnetic properties

*Pengtao Ma, Rong Wan, Yanan Si, Feng Hu, Yueyan Wang, Jingyang Niu\*, and Jingping Wang\**

Key Laboratory of Polyoxometalate Chemistry of Henan Province, Institute of Molecular and Crystal Engineering, College of Chemistry and Chemical Engineering, Henan University, Kaifeng, Henan 475004 P. R. China

**Table S1.** Selected bond distances of **1Dy–5Sm**.

**Table S2.** BVS values of selected oxygens atoms in **1Dy–5Sm**.

**Fig. S1.** Ball-and-stick representation of dimeric polyanion for **1Dy**.

**Fig. S2.** Representation of the dimeric polyanion is assembled by the  $[\text{AsW}_9\text{O}_{33}]^{9-}$  and  $[\text{AsW}_{10}\text{O}_{35}]^{7-}$  subunits together with trinuclear  $[\text{Dy}_3(\mu_3\text{-OH})(\text{H}_2\text{O})_8(\text{mal})]^{6+}$  cluster groups for **1Dy**.

**Fig. S3.** IR spectra of **1Dy–5Sm**.

**Fig. S4.** The excitation spectra of **1Dy** (a), **2Tb** (b), **4Eu** (c), and **5Sm** (d) in the solid state at room temperature.

**Fig. S5.** Decay curves of **1Dy** (a), **2Tb** (b), **4Eu** (c) and **5Sm** (d).

**Fig. S6.** Frequency dependency of the in-phase ( $\chi'$ ) (a) and out-of-phase ( $\chi''$ ) (b) signals from ac susceptibility measurements of **1Dy** under different static field in the range of 0–3000 Oe.

**Fig. S7.** TG curves of **1Dy–5Sm**.

**Table S1** Selected bond distances of **1Dy–5Sm**.

|              | <b>1Dy</b> |              | <b>2Tb</b> |              | <b>3Gd</b> |              | <b>4Eu</b> |              | <b>5Sm</b> |  |
|--------------|------------|--------------|------------|--------------|------------|--------------|------------|--------------|------------|--|
| Dy(1)-O(15)  | 2.333(14)  | Tb(1)-O(15)  | 2.307(17)  | Gd(1)-O(15)  | 2.372(19)  | Eu(1)-O(15)  | 2.356(11)  | Sm(1)-O(15)  | 2.348(12)  |  |
| Dy(1)-O(42)  | 2.356(15)  | Tb(1)-O(74)  | 2.352(17)  | Gd(1)-O(48)  | 2.374(16)  | Eu(1)-O(48)  | 2.394(11)  | Sm(1)-O(42)  | 2.400(12)  |  |
| Dy(1)-O(48)  | 2.363(13)  | Tb(1)-O(48)  | 2.375(17)  | Gd(1)-O(42)  | 2.399(17)  | Eu(1)-O(42)  | 2.411(10)  | Sm(1)-O(48)  | 2.418(12)  |  |
| Dy(1)-O(74)  | 2.385(15)  | Tb(1)-O(42)  | 2.397(17)  | Gd(1)-O(74)  | 2.508(14)  | Eu(1)-O(74)  | 2.414(11)  | Sm(1)-O(74)  | 2.428(11)  |  |
| Dy(1)-O(2W)  | 2.422(16)  | Tb(1)-O(2W)  | 2.428(17)  | Gd(1)-O(2W)  | 2.469(16)  | Eu(1)-O(2W)  | 2.482(12)  | Sm(1)-O(1W)  | 2.496(13)  |  |
| Dy(1)-O(1W)  | 2.432(15)  | Tb(1)-O(1W)  | 2.452(18)  | Gd(1)-O(1W)  | 2.459(17)  | Eu(1)-O(1W)  | 2.482(12)  | Sm(1)-O(2W)  | 2.509(13)  |  |
| Dy(1)-O(3W)  | 2.548(13)  | Tb(1)-O(3W)  | 2.527(16)  | Gd(1)-O(3W)  | 2.577(15)  | Eu(1)-O(3W)  | 2.585(10)  | Sm(1)-O(3W)  | 2.580(10)  |  |
| Dy(1)-O(43)  | 2.563(13)  | Tb(1)-O(43)  | 2.559(15)  | Gd(1)-O(43)  | 2.597(16)  | Eu(1)-O(43)  | 2.585(11)  | Sm(1)-O(43)  | 2.595(11)  |  |
| Dy(1)-O(23)  | 2.615(14)  | Tb(1)-O(23)  | 2.600(16)  | Gd(1)-O(23)  | 2.620(16)  | Eu(1)-O(23)  | 2.604(11)  | Sm(1)-O(23)  | 2.624(12)  |  |
| Dy(2)-O(73)  | 2.264(14)  | Tb(2)-O(73)  | 2.294(18)  | Gd(2)-O(73)  | 2.317(19)  | Eu(2)-O(73)  | 2.301(11)  | Sm(2)-O(73)  | 2.318(12)  |  |
| Dy(2)-O(42)  | 2.324(13)  | Tb(2)-O(42)  | 2.322(15)  | Gd(2)-O(42)  | 2.399(17)  | Eu(2)-O(35)  | 2.364(10)  | Sm(2)-O(42)  | 2.379(11)  |  |
| Dy(2)-O(35)  | 2.344(14)  | Tb(2)-O(35)  | 2.341(16)  | Gd(2)-O(35)  | 2.370(16)  | Eu(2)-O(42)  | 2.371(10)  | Sm(2)-O(35)  | 2.390(11)  |  |
| Dy(2)-O(39A) | 2.372(15)  | Tb(2)-O(39A) | 2.406(18)  | Gd(2)-O(39A) | 2.376(15)  | Eu(2)-O(39A) | 2.402(12)  | Sm(2)-O(39A) | 2.418(12)  |  |
| Dy(2)-O(5W)  | 2.400(15)  | Tb(2)-O(5W)  | 2.415(19)  | Gd(2)-O(5W)  | 2.452(17)  | Eu(2)-O(5W)  | 2.453(12)  | Sm(2)-O(5W)  | 2.480(13)  |  |
| Dy(2)-O(3W)  | 2.400(14)  | Tb(2)-O(3W)  | 2.468(16)  | Gd(2)-O(3W)  | 2.485(17)  | Eu(2)-O(3W)  | 2.470(10)  | Sm(2)-O(3W)  | 2.491(11)  |  |
| Dy(2)-O(4W)  | 2.446(16)  | Tb(2)-O(4W)  | 2.473(18)  | Gd(2)-O(4W)  | 2.486(14)  | Eu(2)-O(4W)  | 2.500(12)  | Sm(2)-O(4W)  | 2.505(12)  |  |
| Dy(2)-O(74)  | 2.489(14)  | Tb(2)-O(74)  | 2.490(15)  | Gd(2)-O(74)  | 2.508(14)  | Eu(2)-O(74)  | 2.506(10)  | Sm(2)-O(74)  | 2.501(11)  |  |
| Dy(3)-O(56)  | 2.268(14)  | Tb(3)-O(56)  | 2.285(18)  | Gd(3)-O(56)  | 2.319(17)  | Eu(3)-O(56)  | 2.320(11)  | Sm(3)-O(56)  | 2.340(12)  |  |
| Dy(3)-O(48)  | 2.305(13)  | Tb(3)-O(30)  | 2.301(17)  | Gd(3)-O(48)  | 2.353(14)  | Eu(3)-O(48)  | 2.351(11)  | Sm(3)-O(48)  | 2.355(11)  |  |
| Dy(3)-O(30)  | 2.321(14)  | Tb(3)-O(48)  | 2.336(17)  | Gd(3)-O(30)  | 2.385(18)  | Eu(3)-O(30)  | 2.354(11)  | Sm(3)-O(30)  | 2.361(12)  |  |
| Dy(3)-O(74)  | 2.385(13)  | Tb(3)-O(8W)  | 2.38(2)    | Gd(3)-O(74)  | 2.424(13)  | Eu(3)-O(74)  | 2.411(10)  | Sm(3)-O(74)  | 2.435(11)  |  |
| Dy(3)-O(7W)  | 2.386(17)  | Tb(3)-O(74)  | 2.412(15)  | Gd(3)-O(8W)  | 2.425(17)  | Eu(3)-O(8W)  | 2.427(14)  | Sm(3)-O(8W)  | 2.436(15)  |  |
| Dy(3)-O(8W)  | 2.398(19)  | Tb(3)-O(6W)  | 2.46(2)    | Gd(3)-O(7W)  | 2.446(16)  | Eu(3)-O(7W)  | 2.456(12)  | Sm(3)-O(7W)  | 2.479(13)  |  |
| Dy(3)-O(6W)  | 2.455(16)  | Tb(3)-O(7W)  | 2.454(18)  | Gd(3)-O(6W)  | 2.506(17)  | Eu(3)-O(6W)  | 2.515(13)  | Sm(3)-O(6W)  | 2.513(15)  |  |
| Dy(3)-O(23)  | 2.532(14)  | Tb(3)-O(23)  | 2.523(17)  | Gd(3)-O(23)  | 2.577(17)  | Eu(3)-O(23)  | 2.545(11)  | Sm(3)-O(23)  | 2.578(12)  |  |

**Table S2** BVS values of selected oxygens atoms in **1Dy–5Sm**.

| atom  | BVS        |            |            |            |            | protonation    |
|-------|------------|------------|------------|------------|------------|----------------|
|       | <b>1Dy</b> | <b>2Tb</b> | <b>3Gd</b> | <b>4Eu</b> | <b>5Sm</b> |                |
| O(74) | -0.976     | -1.069     | -1.068     | -1.112     | -1.118     | monoprotonated |
| O(1W) | -0.312     | -0.321     | -0.345     | -0.332     | -0.332     | diprotonated   |
| O(2W) | -0.321     | -0.343     | -0.336     | -0.332     | -0.321     | diprotonated   |
| O(3W) | -0.568     | -0.570     | -0.572     | -0.594     | -0.601     | diprotonated   |
| O(4W) | -0.300     | -0.304     | -0.321     | -0.316     | -0.324     | diprotonated   |
| O(5W) | -0.340     | -0.355     | -0.351     | -0.359     | -0.347     | diprotonated   |
| O(6W) | -0.293     | -0.315     | -0.304     | -0.304     | -0.317     | diprotonated   |
| O(7W) | -0.353     | -0.320     | -0.357     | -0.356     | -0.348     | diprotonated   |
| O(8W) | -0.342     | -0.390     | -0.378     | -0.385     | -0.390     | diprotonated   |

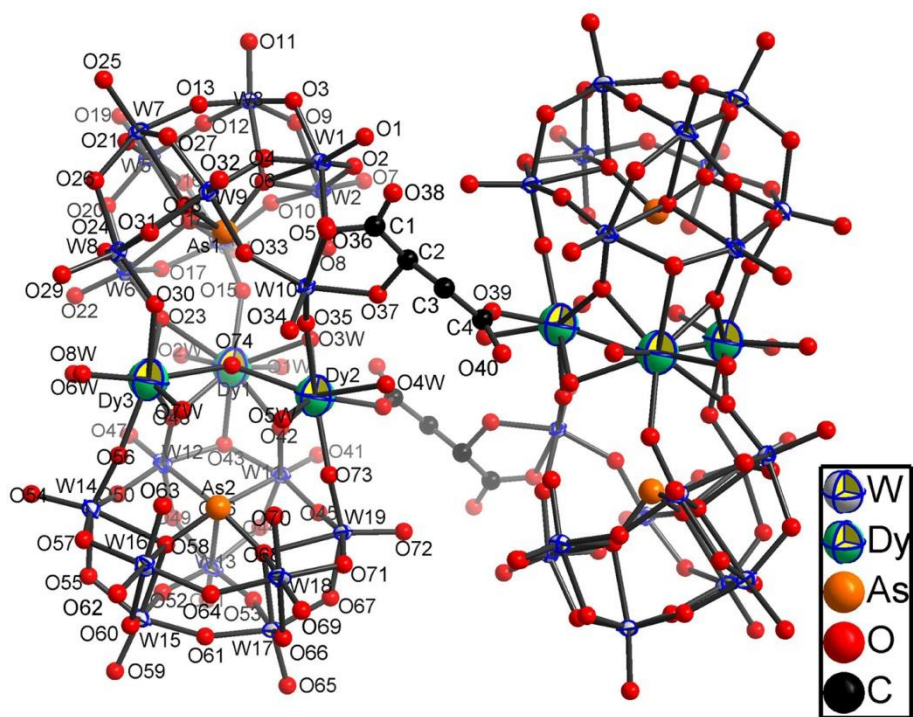

**Fig. S1** Ball-and-stick representation of dimeric polyanion for **1Dy**.

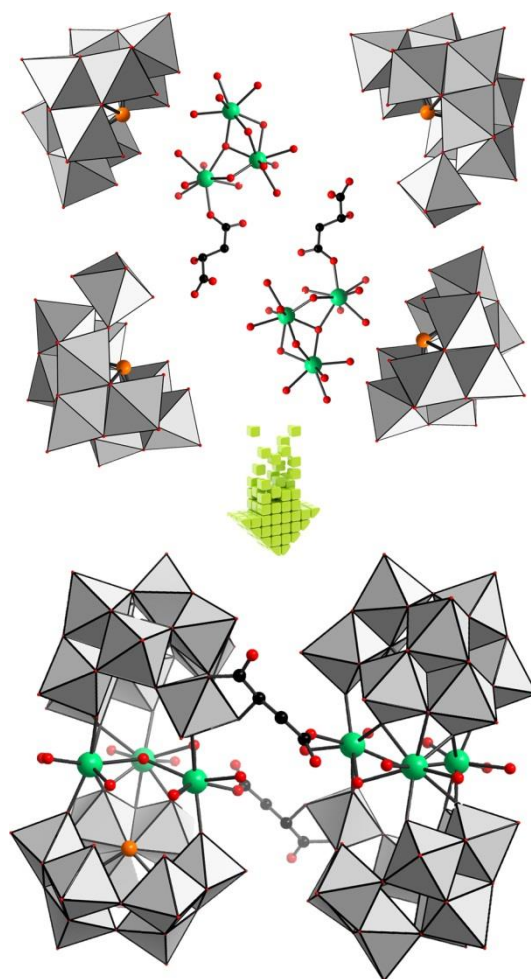

**Fig. S2** Representation of the dimeric polyanion is assembled by the  $[\text{AsW}_9\text{O}_{33}]^{9-}$  and  $[\text{AsW}_{10}\text{O}_{35}]^{7-}$  subunits together with trinuclear  $[\text{Dy}_3(\mu_3\text{-OH})(\text{H}_2\text{O})_8(\text{mal})]^{6+}$  cluster groups for **1Dy**.

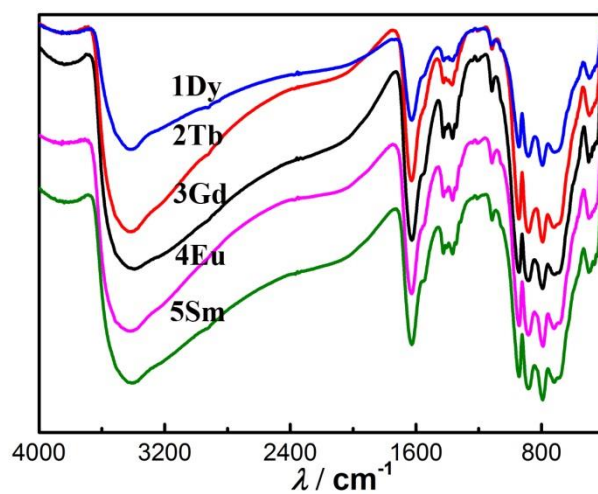

**Fig. S3.** IR spectra of **1Dy–5Sm**.

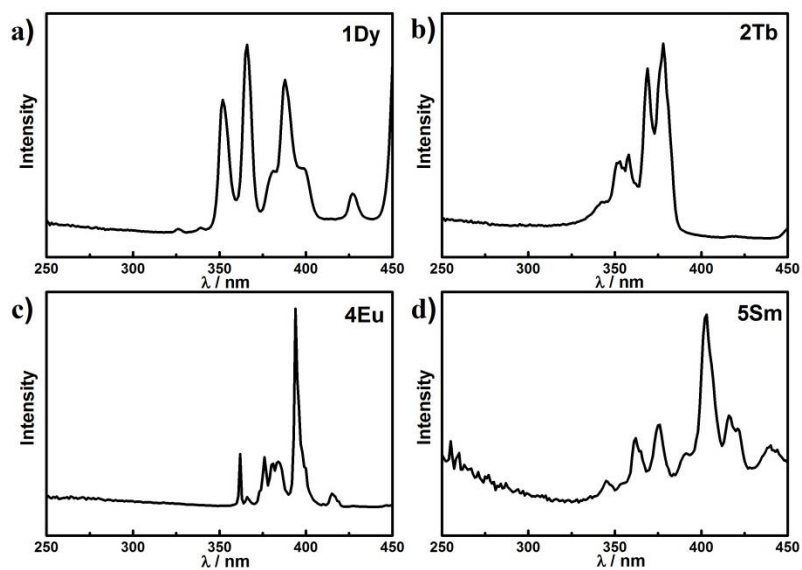

**Fig. S4** The excitation spectra of **1Dy** (a), **2Tb** (b), **4Eu** (c), and **5Sm** (d) in the solid state at room temperature.

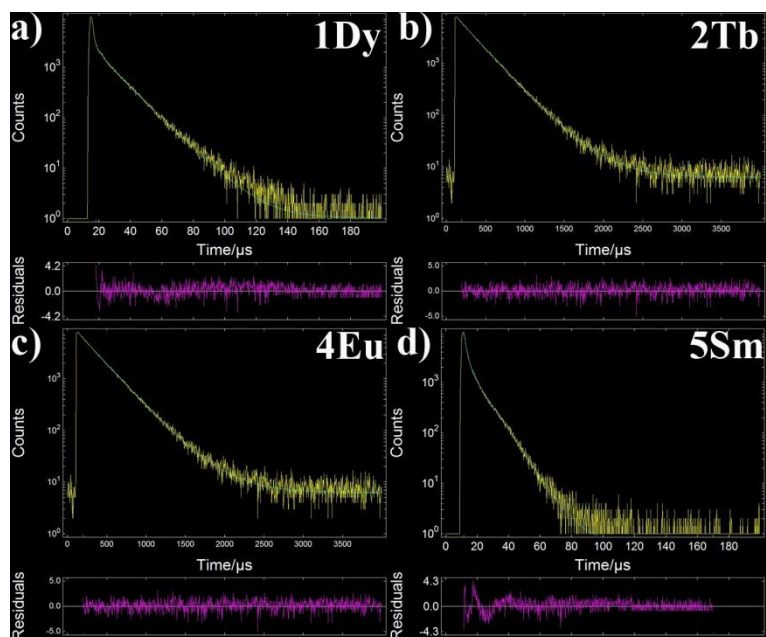

**Fig. S5** Decay curves of **1Dy** (a), **2Tb** (b), **4Eu** (c) and **5Sm** (d).

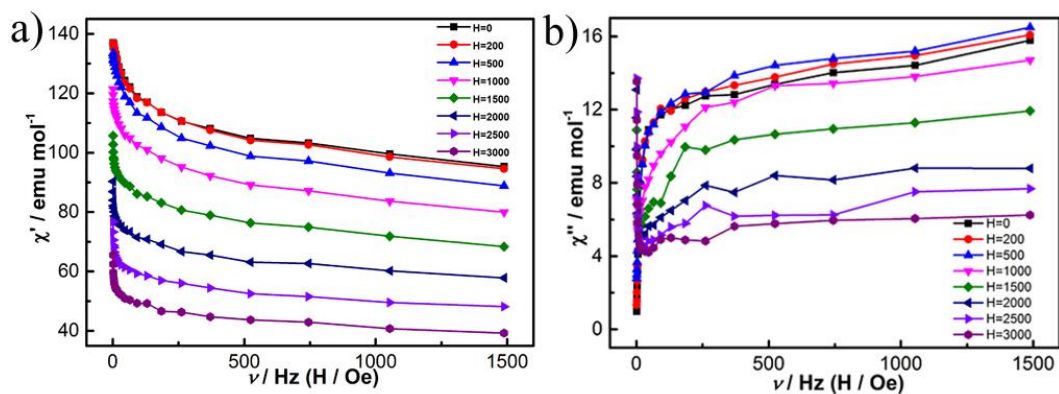

**Fig. S6** Frequency dependency of the in-phase ( $\chi'$ ) (a) and out-of-phase ( $\chi''$ ) (b) signals from ac susceptibility measurements of **1Dy** under different static field in the range of 0–3000 Oe.

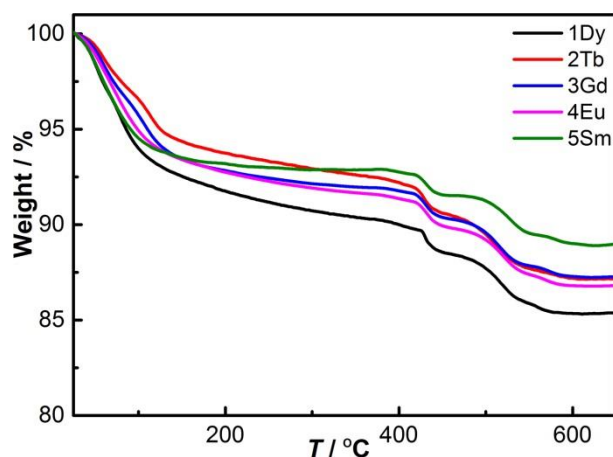

**Fig. S7** TG curves of **1Dy–5Sm**.

The thermal behaviors of the five compounds have been analyzed upon heating to 650 °C. The TG curves show three mass losses stages (Fig. S7). The first stage occurring below 200 °C can be ascribed to the loss of the surface adsorbed water and seventeen lattice water molecules. The second weight loss of about 1.2% in the range of 380–470 °C could be attributed to the sublimation of one  $\text{As}_2\text{O}_3$  group. The third weight loss of about 2.8% up to 600 °C, corresponding to the removal of one hydroxyl ion, eight coordinated water molecules, and two malate ligands. The oxidation of organic ligands together with the collapse of the POMs framework occurs in this process.
